# Supplementary material for: Exploration of the antagonist CP-376395 escape pathway for the corticotropin-releasing factor receptor 1 by random acceleration molecular dynamics simulations
Source: Royal Society of Chemistry journal article supplement (doi:10.1039/c4mb00037d), 2014-03-28
Supplement: c4mb00037d1.pdf [file c4mb00037d1.pdf]

**Exploration of antagonist CP-376395 escape pathway for the corticotropin-releasing factor receptor 1 by random acceleration molecular dynamics simulations**

Qifeng Bai<sup>1</sup>, Danfeng Shi<sup>1</sup>, Yang Zhang<sup>2</sup>, Huanxiang Liu<sup>3</sup>, Xiaojun Yao<sup>1,4\*</sup>

<sup>1</sup>College of Chemistry and Chemical Engineering, Lanzhou University, Lanzhou, Gansu 730000, P. R. China

<sup>2</sup>School of Information Science & Engineering, Lanzhou University, Lanzhou, Gansu 730000, P. R. China

<sup>3</sup>School of Pharmacy, Lanzhou University, Lanzhou, Gansu 730000, P. R. China

<sup>4</sup>State Key Laboratory of Quality Research in Chinese Medicine, Macau Institute for Applied Research in Medicine and Health, Macau University of Science and Technology, Taipa, Macau, China

\* Corresponding author

Tel.: +86-931-891-2578

Fax: +86-931-891-2582

E-mail: xjyao@lzu.edu.cn

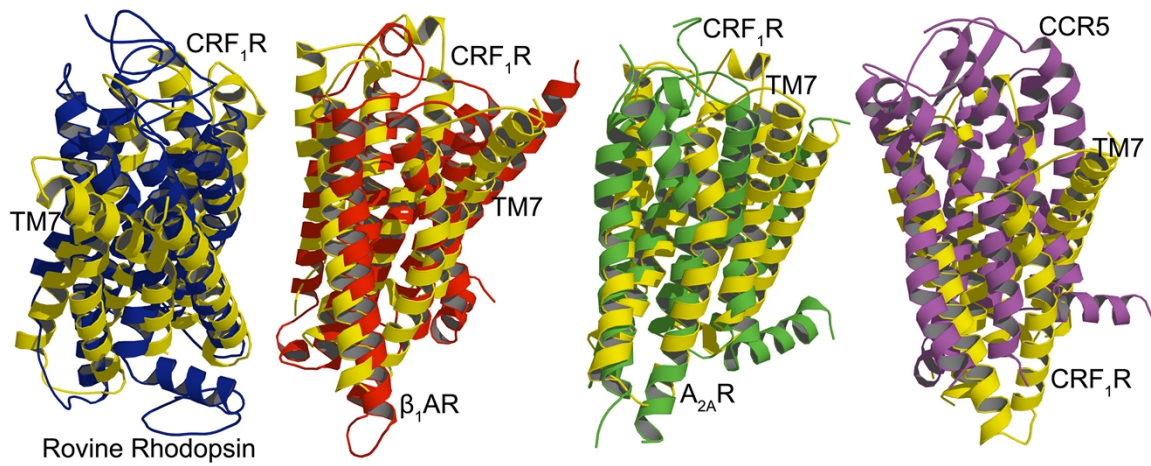

**Figure S1:** The structural alignment between the bovine rhodopsin (PDB ID: 1U19),  $\beta_1$  adrenergic receptor ( $\beta_1AR$ , PDB ID: 3ZPQ), Adenosine A2a receptor ( $A_{2A}R$ , PDB ID: 3EML), C-C chemokine receptor type 5 (CCR5, PDB ID: 4MBS) and  $CRF_1R$ . The cartoon structure of  $CRF_1R$  is shown with yellow color in the four alignment structure, and others receptors correspond the remaining colors.

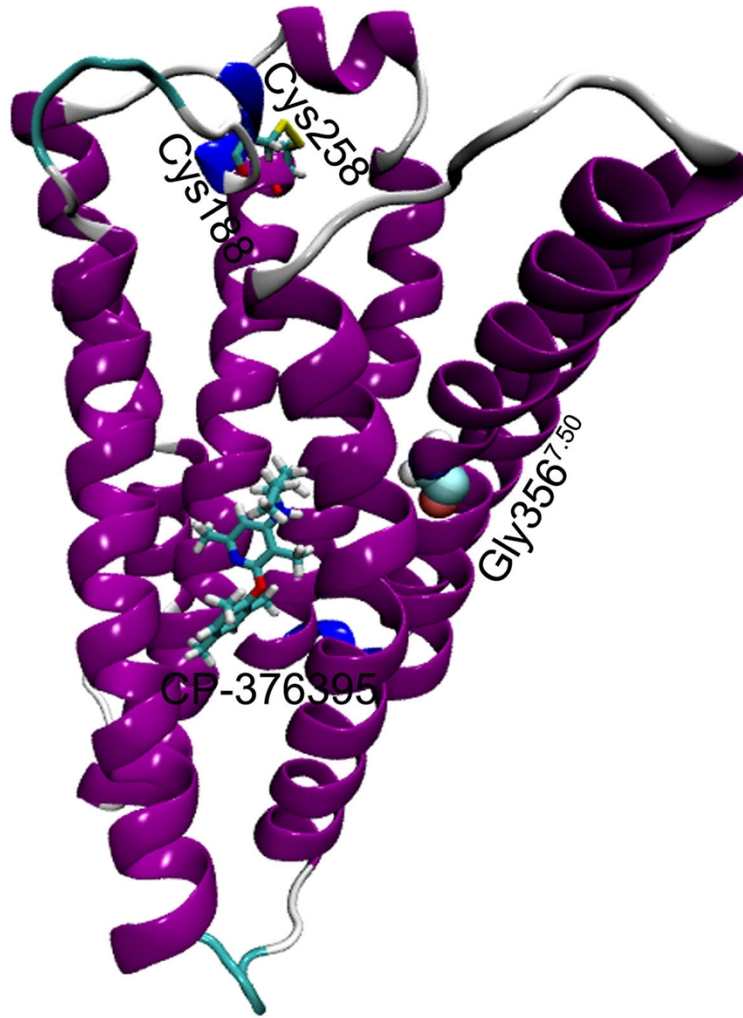

**Figure S2:** The antagonist CP-376395 and key residues of CRF<sub>1</sub>R.

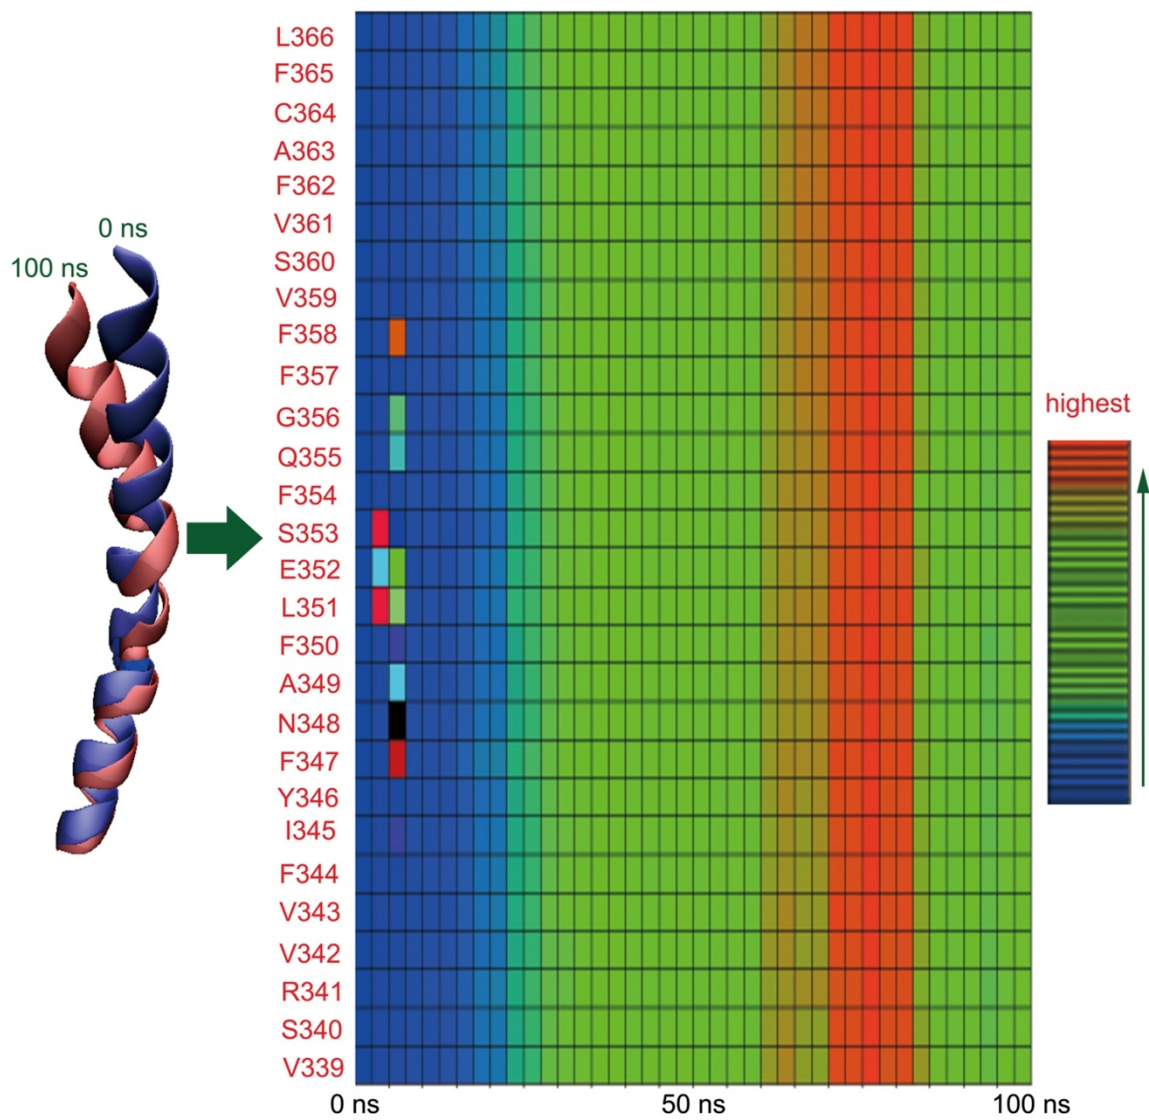

**Figure S3:** The RMSD of backbone atoms of the residues of TM7.

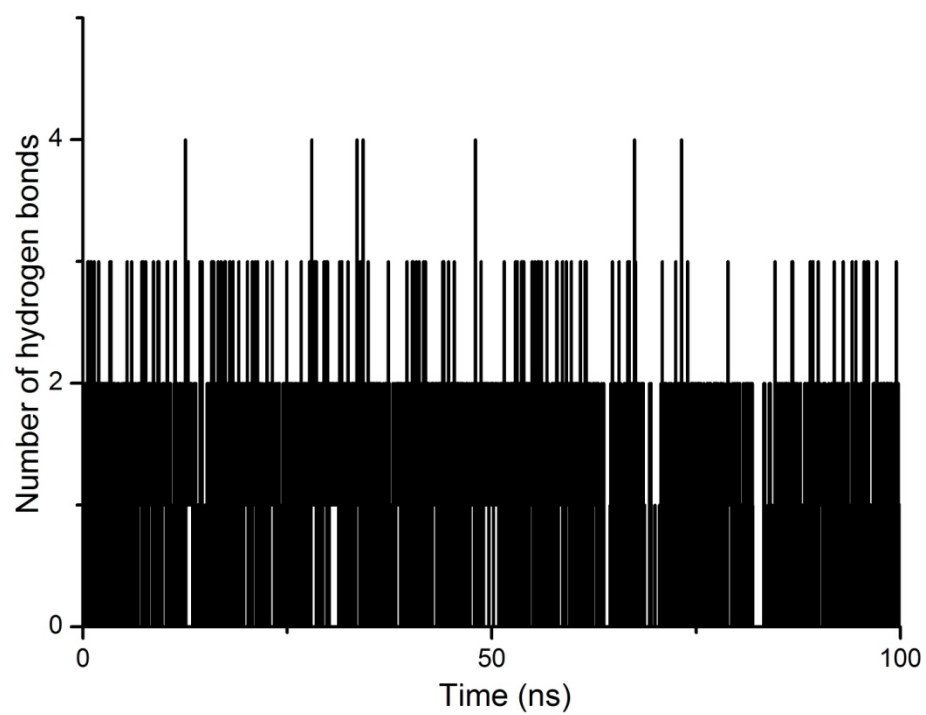

**Figure S4:** Total number of hydrogen bonds between the residues of CRF<sub>1</sub>R and the antagonist CP-376395 during the 100 ns MD simulations.

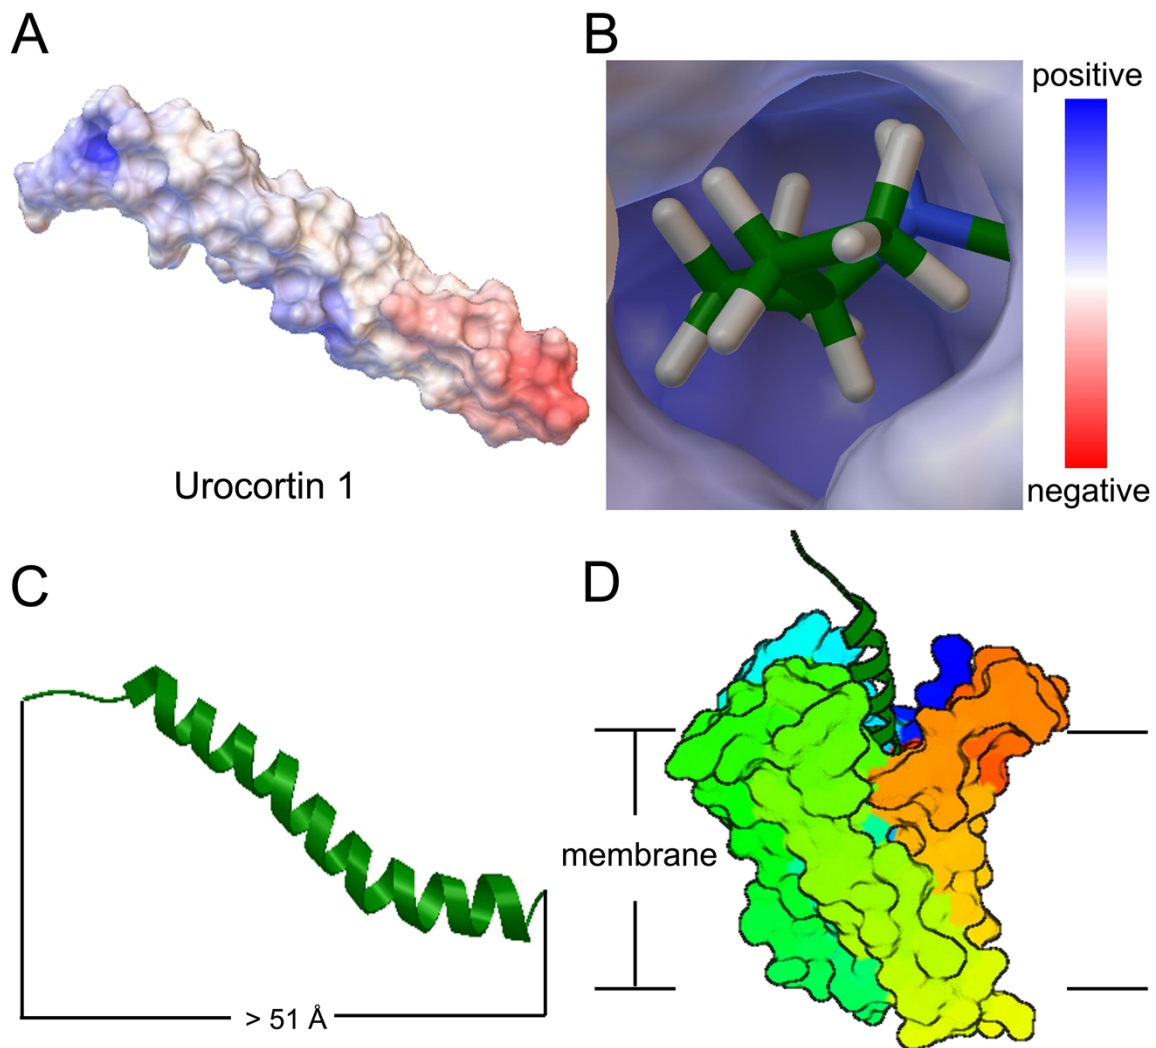

**Figure S5:** The agonist urocortin 1 of CRF<sub>1</sub>R. (A) The electrostatic potential of urocortin 1. (B) The electrostatic potential of CRF<sub>1</sub>R pocket. (C) The length of urocortin 1 (PDB ID: 2RMF). (D) Assumed model of CRF<sub>1</sub>R in complex with urocortin 1.

**Table S1. Occurrence number of three pathways in different constant forces**

| Pathway | 20 (kcal/mol·Å) | 50 (kcal/mol·Å) | 100 (kcal/mol·Å) |
|---------|-----------------|-----------------|------------------|
| PW1     | 1               | 2               | 8                |
| PW2     | 0               | 1               | 6                |
| PW3     | 19              | 17              | 6                |
